# Supplementary material for: Clinical management and survival outcomes of patients with different molecular subtypes of diffuse gliomas in China (2011–2017): a multicenter retrospective study from CGGA
Source: PubMed Central journal article supplement (PMC9630520; doi:10.20892/j.issn.2095-3941.2022.0469), 2022-11-01
Supplement: cbm-19-1460-s001.pdf [file cbm-19-1460-s001.pdf]

## Supplementary materials

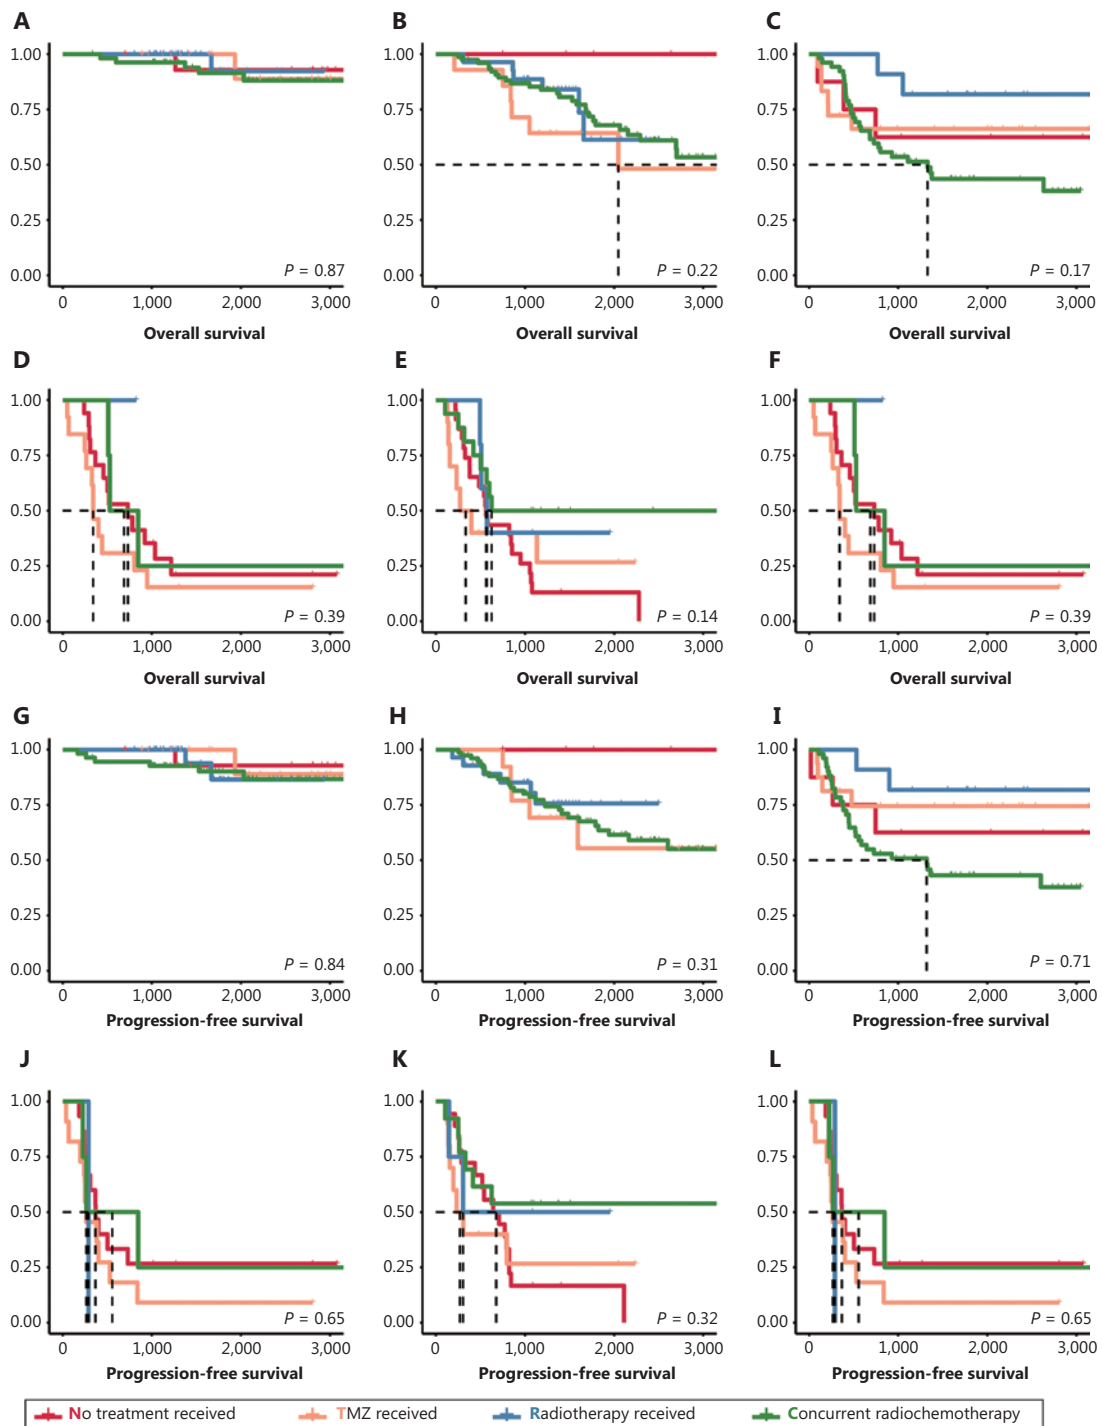

**Figure S1** Survival outcomes of patients with LGG receiving different postsurgical treatments. (A–C) Kaplan–Meier curves estimating the overall survival of patients with primary LGG-IDHm-1p/19q (A), LGG-IDHm (B), and LGG-IDHwt (C). (D–F) Kaplan–Meier curves estimating the overall survival of patients with recurrent LGG-IDHm-1p/19q (D), LGG-IDHm (E), and LGG-IDHwt (F). (G–I) Kaplan–Meier curves estimating progression-free survival of patients with primary LGG-IDHm-1p/19q (G), LGG-IDHm (H), and LGG-IDHwt (I). (J–L) Kaplan–Meier curves estimating progression-free survival of patients with recurrent LGG-IDHm-1p/19q (J), LGG-IDHm (K), and LGG-IDHwt (L).

**Table S1** Overall survival (OS) and progression-free survival (PFS) in patients with diffuse gliomas

|                                    | LGG, IDH-mutant and<br>1p/19q-codeleted | LGG, IDH-mutant | LGG, IDH-wildtype | GBM, IDH-mutant | GBM, IDH-wildtype |
|------------------------------------|-----------------------------------------|-----------------|-------------------|-----------------|-------------------|
| Overall survival rate (%)          |                                         |                 |                   |                 |                   |
| At 1 year                          | 99.37                                   | 88.59           | 81.20             | 57.40           | 47.81             |
| At 3 year                          | 92.14                                   | 63.31           | 45.08             | 21.95           | 13.97             |
| At 5 year                          | 76.54                                   | 41.09           | 31.43             | 8.84            | 5.01              |
| Progression free survival rate (%) |                                         |                 |                   |                 |                   |
| At 1 year                          | 96.84                                   | 88.62           | 72.36             | 50.69           | 35.60             |
| At 3 year                          | 90.65                                   | 62.66           | 45.13             | 21.43           | 12.23             |
| At 5 year                          | 74.07                                   | 40.67           |                   | 9.76            | 4.33              |

**Table S2** Overall survival (OS) and progression-free survival (PFS) in patients with diffuse gliomas grouped by WHO grade

| WHO histological grade | II    | III   | IV    |
|------------------------|-------|-------|-------|
| Median OS (month)      | N/A   | 55.63 | 12.53 |
| OS rate (%)            |       |       |       |
| At 1 year              | 96.86 | 89.09 | 52.41 |
| At 3 year              | 86.27 | 61.64 | 16.84 |
| At 5 year              | 67.60 | 43.52 | 6.12  |
| Median PFS (month)     | N/A   | 53.07 | 9.5   |
| PFS rate (%)           |       |       |       |
| At 1 year              | 95.32 | 85.07 | 41.10 |
| At 3 year              | 86.38 | 59.48 | 15.83 |
| At 5 year              | 67.80 | 43.55 | 5.90  |

**Table S3** Univariate and multivariate Cox proportional-hazards models for primary diffuse gliomas

| Variable                             | Hazard ratio (95% CI) |                       |
|--------------------------------------|-----------------------|-----------------------|
|                                      | Univariate            | Multivariate          |
| Age at diagnosis <sup>1</sup>        | 1.051 (1.042–1.06)    | 1.014 (1.004–1.024)   |
| Sex                                  |                       |                       |
| Female                               | Reference             |                       |
| Male                                 | 1.285 (1.049–1.575)   |                       |
| Histological grade <sup>2</sup>      | 3.98 (3.392–4.669)    | 3.624 (2.233–5.884)   |
| Molecular subtype                    |                       |                       |
| LGG, IDH-mutant and 1p/19q-codeleted | Reference             | Reference             |
| LGG, IDH-mutant                      | 5.375 (2.516–11.484)  | 5.998 (2.626–13.699)  |
| LGG, IDH-wildtype                    | 10.202 (4.808–21.647) | 6.113 (2.69–13.893)   |
| LGG, NOS                             | 3.09 (1.449–6.589)    | 3.545 (1.517–8.286)   |
| GBM, IDH-mutant                      | 14.461 (6.676–31.325) | 4.239 (1.523–11.796)  |
| GBM, IDH-wildtype                    | 36.718 (18.055–74.67) | 10.304 (3.904–27.19)  |
| GBM, NOS                             | 23.821 (10.63–53.381) | 3.641 (0.829–15.993)  |
| MGMT                                 |                       |                       |
| Unmethylated                         | Reference             |                       |
| Methylated                           | 0.498 (0.401–0.618)   |                       |
| KPS_pre <sup>3</sup>                 | 0.945 (0.931–0.959)   |                       |
| KPS_post <sup>4</sup>                | 0.937 (0.928–0.945)   | 0.971 (0.958–0.984)   |
| Resection rate                       |                       |                       |
| Total resection                      |                       |                       |
| Subtotal resection                   | 2.142 (1.68–2.73)     | 2.499 (1.878–3.325)   |
| Major partial resection              | 8.397 (6.289–11.211)  | 9.957 (6.928–13.311)  |
| Partial resection                    | 16.44 (11.752–22.997) | 51.13 (30.918–84.557) |
| Radiotherapy                         |                       |                       |
| Not received                         | Reference             |                       |
| Received                             | 1.286 (0.978–1.691)   |                       |
| Chemotherapy                         |                       |                       |
| Not received                         | Reference             | Reference             |
| Received                             | 1.897 (1.459–2.467)   | 0.603 (0.443–0.822)   |

<sup>1</sup>The hazard ratio is for each 1-yr increase in age. <sup>2</sup>The hazard ratio is for each 1 grade increase in WHO grade. <sup>3</sup>The hazard ratio is for each 1 point increase in KPS score. <sup>4</sup>The hazard ratio is for each 1 point increase in KPS score.
